# Supplementary material for: Reduced decline of lung diffusing capacity in COPD patients with diabetes and metformin treatment
Source: Springer Nature journal article supplement (doi:10.1038/s41598-022-05276-x), 2022-01-26
Supplement: MOESM1 [file 41598_2022_5276_MOESM1_ESM.pdf › 41598_2022_5276_MOESM1_ESM.pdf]

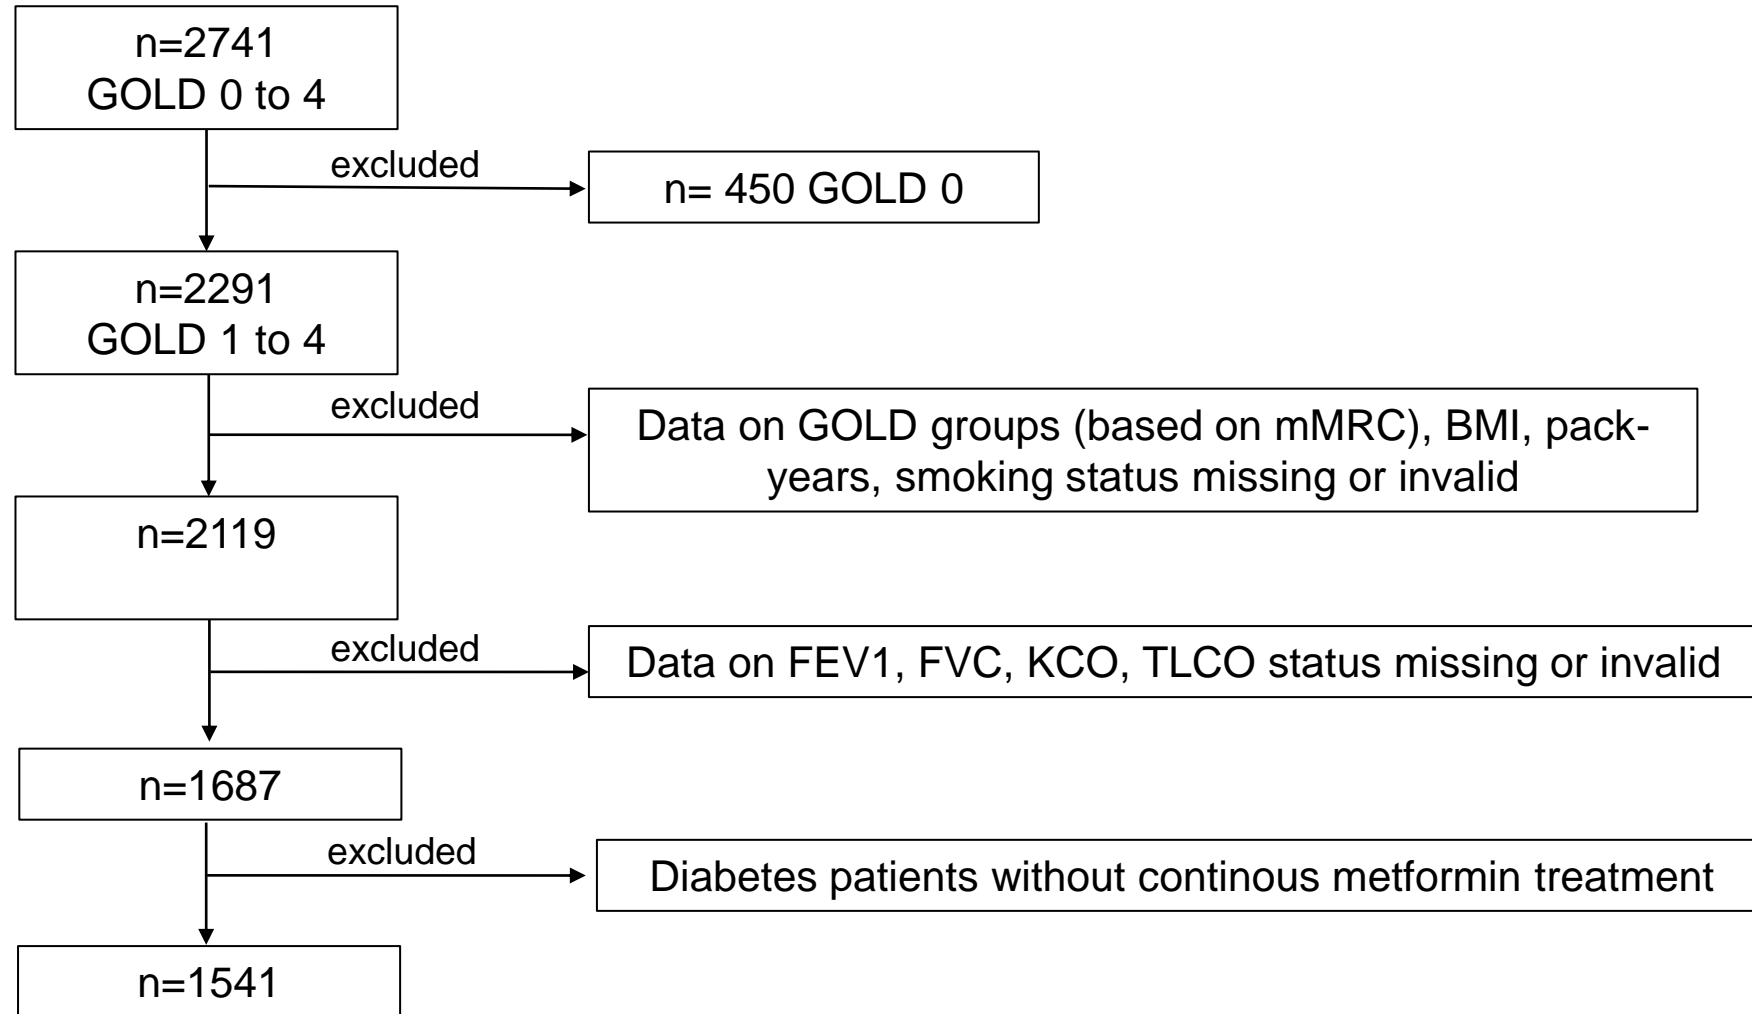

**Figure S1:** Flow chart of the selection of patients for the final analysis
